# Supplementary material for: Identification and validation of an H2AZ1-based index model: a novel prognostic tool for hepatocellular carcinoma
Source: Aging (Albany NY). 2024 Feb 1;16(3):2542–62. doi: 10.18632/aging.205497 (PMC10911386; doi:10.18632/aging.205497)
Supplement: Supplementary Table 4 [file aging-16-205497-s002.xlsx]

## Sheet: Sheet1
Supplementary Table 4. Tumor stemness-related gene set.
chromatin_remodeling	EPCAM-UP	EPCAM-DOWN	Proliferation-Down	Proliferation-Up	T.cell.exhaustion.UP	Inflammation	Latecellcycle	HALLMARK_WNT_BETA_CATENIN_SIGNALING	HALLMARK_NOTCH_SIGNALING
ACTB	ROBO2	PIK3C3	CES2	LOC388610	RASA1	BCS1L	CDK1	MYC	JAG1
ACTL6A	ARPC5L	IGF1	CYP8B1	C10orf3	SPOCK2	PRMT7	CDK4	CTNNB1	NOTCH3
ACTR3B	SEMA4G	PIK3C2G	GLYAT	SPHK1	RASA1	ZNF826	CDK2	JAG2	NOTCH2
ACTR5	PDGFRB	MAP2K2	AQP9	DEPDC1B	CDC14A	KAAG1	CCNE1	NOTCH1	APH1A
ACTR6	PLCB1	ARHGEF15	DCXR	PIGAP1	TNFRSF25	CUGBP2	CDC20	DLL1	HES1
ARID1A	PRKCD	HNF4A	ABCB4	AURKB	PTGER4	TP53BP2	CCNB2	AXIN2	CCND1
ARID2	FGFR3	MYLK	SLC10A1	MAPK13	PDCD4	PPM1K	CCNB1	PSEN2	FZD1
ATAD2	FZD5	MAP3K5	kobee	KIF23	TNFAIP3	ZNF76	CCNA2	FZD1	PSEN2
ATRX	MERTK	CDKN2A	HPD	MMD	GADD45A	FAM83H	BUB1	NOTCH4	FZD7
BAHD1	DDR1	GADD45A	FLJ20581	FBXO5	RGS1	LOC641522	CDC25A	LEF1	DTX1
BAZ2A	LINGO1	DUSP1	DAO	rerkar	BIRC3	GSDMB	CCNE2	AXIN1	DLL1
BRD4	SEMA3C	ESR1	AR	LRRC1	SLC7A5	LOC389286	MYBL2	NKD1	FZD5
BPTF	UBD	RARG	ABCA6	choybuby	PDE4B	C18ORF25	FOXM1	WNT5B	MAML2
BRMS1	SMAD5	GYS2	GYS2	KIF11	NELL2	C1ORF150	PLK1	CUL1	NOTCH1
CHAF1A	GRB7	CLDN2	TMEM7	ASRGL1	GNAQ	PARD6B		JAG1	PSENEN
CHAF1B	ITGB5	NR1I2	HSD11B1	ZNF532	TNFAIP3	PARD6G		MAML1	WNT5A
CHD1	DDEF1	NR1I3	CYP4F11	TTK	HSPH1	LETMD1		KAT2A	CUL1
CHD1L	BAK1	CYP7A1	HNF4A.1	SLC1A5	TAF9B	TAF1C		GNAI1	WNT2
CHD2	CYCS	ALDH1L1	LDHD	UBE2C	RGS1	ZFP42		WNT6	DTX4
CHD3	YWHAZ	ABCB1	FMO3	BUB1B	SESN1	IL34		PTCH1	SAP30
CHD4	CCNB2	SLC10A1	CYP4F2	CENPE	CCNH	OR1J1		NCOR2	PPARD
CHD6	WEE1	SLC27A2	PFKFB1	MKI67	IFRD1	MADD		DKK4	KAT2A
CHD7	ELF3	CD14	MASP2	FLJ10719	MED14	HSPC268		HDAC2	HEYL
CHD8	DKK1	GSTM1	ECHDC2	CENPF	MRPS22	WDR59		DKK1	SKP1
CHD9	SOX9	ALDH6A1	MAT1A	ARID3A	MC2R	ACYP2		TCF7	RBX1
CTBP1	TCF7L2	GSTM4	FMO4	CDC6	ACVR1B	C15ORF60		WNT1	TCF7L2
CTCF	CSNK1E	ACSL5	APOA5	SHCBP1	PDE4B	LOC389517		NUMB	ARRB1
CXXC1	BACE2	CES2	LOC388503	SYNJ2	SYNJ2	DYNLL2		ADAM17	LFNG
DEK	CLDN4	FMO3	BAAT	CDCA1	WRN	ACTRT1		DVL2	PRKCA
DMAP1	CLDN1	SULT2A1	AFM	IPW.2	ZNF238	C8ORF37		PPARD	DTX2
DPF2	MMP11	GSTA1	EHHADH	CCNE1	SNX4	LOC729021		NCSTN	ST3GAL6
DPF3	SULT1C2	CYP2C8	LOC91614	ETV4	CDC14A	FUT10		HDAC5	FBXW11
EP400	ACSL4	LC27A5	RPIB9	SGOL2	RGPD4	DAP		CCND2
ERCC6	ACSL3	CYP3A7	SCP2	zf-C2H2.20	RGPD5	USP49		FRAT1
GADD45A	FABP5	ABCG5	SEC14L2	LMNB1	RGPD6	ANKRD44		CSNK1E
GADD45B	GSTP1	ALDH8A1	BHMT2	toki	RGPD8	CEP97		RBPJ
GADD45G	ADCY3	APOC4	APOC2andAPOC4	BARD1	PIK3IP1	IL19		FZD8
HCFC1	THBS1	CYP3A4	C8A	LOC120376	CD28	XPNPEP3		TP53
HELLS	DNAJA4	ACSL1	ADH1A	KIF4A	JMJD6	HMGB4		SKP2
HLTF		ABCB11	ACADL	PRKCD	KIAA0999	DCTN3		HEY2
HMG20B		FMO4	SERPINC1	HELLS.shed3	TACC1	C1ORF95		HEY1
IKZF1		MAOA	SRD5A1	SMC4L1	SYPL1	APRT		HDAC11
ING3		UGT2B15	DHTKD1	ANLN	C9orf97	NBPF1
INO80		UGT2B7	pleejy	TMEM51	PABPC3	RCE1
INO80B		PPARGC1A	LONP	DKFZp762E1312	ABCG1	FAM19A4
INO80C		CYP1A2	CCL16	CDCA5	TAPT1	DUX4
INO80D		NQO2	GCDH	ECT2	YPEL5	HCG9
INO80E		CES1	ALDH6A1	KIF2C	GOLGA8E	KIAA1542
KAT5		CYP7B	KCNJ8	AFP	GOLGA8G	TIMM44
LRWD1		CYP8B1	CTH	HCAP-G	RBPJ	FAM108A3
MBD5		ABCB4	SULT2A1	CCNA2	ZNF136	NRARP
MBD6		AOX1	ABCB11	TRIP13	PDE4B	MRPL41
MTA1		SOD1	ECM2	PSF1	ARHGAP5	CYP4B1
MTA3		FKBP5	F12	PAFAH1B3	ZRF1	SNX22
MYBBP1A		C8A	PIPOX	CCNB1	EIF1	KIAA1632
MYO1C		C1R	HAAO	SAS-6	LONRF3	MAGI3
NASP		MASP1	AZGP1	CYBA	AREG	AES
NCOA2		C6	smufawbo	BIRC5	CTSO	EXOC6
NFRKB		C8B	HSD17B6	FLJ11029	MASP2	PHF5A
PHF10		MASP2	ACBD4	MTMR2	TMEM184B	AMAC1
PHF19		SERPINC1	MPDZ	PKM2	DUSP4	RABAC1
PIWIL4		KLKB1	ABAT	CDC20	SLC39A8	AGXT2L2
PSIP1		F9	MTHFD1	GPD1L	PLXDC1	PGF
RAD54B		KNG1	HAO1	nosoy	BCAS2	BRPF1
RAD54L2		F11	HAGH	ORC6L	MAP4K3	DBN1
RB1		APCS	ALDH1L1	LOC146909	MED4	ZMAT5
RSF1		RBP5	AGXT2L1	DLG7	RIF1	DUXAP3
RUVBL1		HRG	OTC	PDE9A	PLXDC1	DSCAM
RUVBL2		SAA4	BTD	ARHGAP18	ZBTB10	DMC1
SETD6		SNAI2	C6	HMGB2	LOC442215	ADCY6
SMARCA1		GADD45B	MGC15937	PNMA1	SPATA2	TRPC4AP
SMARCA5		APOA5	SELENBP1	CCNB2	CDK5R1	ZNF473
SMARCAD1			ETNK2	CSDA	LRIG1	PRKCB1
SMARCAL1			PCK1	PLP2	FAM102A	AGPAT3
SMARCC1			ACYP2	CDC7	RAB6IP1	PYGO2
SMARCC2			NR1I2	CKAP4	DNAJB12	GAGE4
SMARCD1			LOC283537	PTTG1	EIF4H	C6ORF108
SMARCD2			cheylorby	ZWINT	CD44	ORC6L
SMARCD3			ARGBP2	CHST11	OSBP	CYHR1
SMARCE1			ETFDH	ELF4	IDI1	FGD2
SRCAP			LRRNT.0	FLJ40629	TCEAL4	SPTBN5
TFPT			MTP	SC65	ZNF395	RPL34
TOP2A			CPT2	FOXM1	KLHL11	CRYBB2
TOP2B			tarzo	GLIS2	CBLB	LOC648148
VPS72			LOC440388	LOC401905	IL7R	FLJ40453
YY1			BHMT	DBN1	YIPF5	TBCD
ZHX1			ADRB2	garjer	PBXIP1	C11ORF55
ZNHIT1			GAMT	KNTC2	GULP1	FLJ45966
ZRANB3			CYP4A11	SOX4	CCRN4L	C14ORF85
			ST3GAL6	SLC38A1	IHPK1	GSTTP2
			GRHPR	SALL4	APOM	ECGF1
			flabee	KIF20A	APBA2	ARL16
			EPHX1	MARCKSL1	WDR48	MRPL34
			MYO1B	fashor	RMND5A	ZNF542
			GPLD1	LHFPL2	ETV3	TNIP3
			GPT	CDC2	ZMYM2	POLR1A
			LOC440286	KIF14	LOC151162	PTGR2
			CYP27A1	maky	GOLGA8E	FKTN
			AADAC	FUNDC1	PDCD4	GTPBP10
			LOC134147	OIP5	THOC1	TAF15
			PDK4	IMP-3	ARNTL	C1ORF118
			CDO1.shed4	WASF1	C12orf41	DENR
			tAKR	DDR1	TNF	ZNF43
			CAT	C18orf24.1	TMEM30B	OSBPL7
			NAT2	TPX2	MBOAT5	GP6
			lyta	TNFRSF21	SLC6A13	FXR1
			RGN	TOP2A	KIR2DS3	DOK3
			CYP3A43	HSUP1	KIAA0831	PDCD7
			RWDD3.shed2	HK2	C1QBP	BSG
			CA5A	MAD2L1	EIF4G1	MCM8
			GNE	B3GNT5	MSH6	C8ORF45
			CYP2C9	FKSG14	RIG	FLJ35848
			ANGPTL3	MMP9	N4BP3	HRH4
			PNPO	NEK2	FILIP1L	TPM3
			F8	ASPM	NR4A2	C1ORF151
			AASS	NCK2	IDI1	KCNJ4
			NUDT6	MCM2	KLF9	EID2B
			nehu	HDAC2	C6orf64	LRRC10
			TM6SF2andHAPL	VEGFB	PELO	GCLM
			CYP2J2	SLC16A3	PFN2	PRIM2
			AOX1	CDCA7	TGIF1	GNG10
			TST	mutura	RABGGTB	FAM177A1
			KLF9	PBK	CAND2	AIRE
			shorgor	EZH2	LIMK2	GRM6
			NR1I3	TMEM65	RWDD2A	PIGW
			POR	CD24	DKK3	KIAA1553
			CYP4A22	ATP1A1	RNF125	CLCC1
			CUTL2	S100P	PELI2	BRIP1
			HFE2	PRC1	CDCA4	RFX4
			MLYCD	totera	PRKCI	IKZF4
			LOC201895	tumare	ATP2B1	C21ORF24
			ALAS1	GALNT7	SFRS3	FAM119A
			ITIH1	B4GALT5	LEPROTL1	LOC221091
			TAT	FLVCR	PPP1R2	A1BG
			CYP4F3	FEN1	SYPL1	IQWD1
			TTPA	LOC143458	FAIM	S100A1L
			remeru	CGI-62	CD44	C15ORF37
			SLC2A2	ELOVL7	RABL3	TMEM156
			AGXT	KIAA0746	LRRC40	STAG3L1
			AGXT2	EVI1	CXCR3	ZNF223
			RCL1	NUSAP1	NR4A2	ZC3HAV1L
			HADHSC	CDCA7L	SATB1	RAB39
			CYP2B6	munira	YTHDC2	SLC4A5
			fersweeby	HN1	CCT6B	FLJ44124
			CDC14B	WSB1.shed1	CKAP2	CDKN2D
			KNG1	ACY1L2	PABPC1	PSTK
			RBP5	jupoy	ADAM9	FAM39DP
			RORC	kihure	KLF7	RPS9
			CCL14	PAPLN	RPAIN	PTPLAD1
			BOK	HIST1H4C	SNRPA1	GIYD1
			WNK3	CKLFSF3	WDR48	SNHG10
			MYRIP	RAD51AP1	DHX29	RAXL1
			SERPING1	UGCG	SSX2IP	DUX5
			ABCA8	DEPDC1	C9orf82	C4ORF34
			AKR7A3	SLC39A10	CFHR2	PTPLAD2
			BLOC1S1	PTP4A3	GNAI3	CEP27
			HIBADH	FLJ12442	TSFM	IL10
			ABCG8	G6PD	FBXL11	REXO1L1
			CYP2C8	MGC14289.1	PPP1CB	CCBE1
			FAM79B	LAMB1	NVL	CYCSL1
			seyura	FHOD3	EIF4G2	FLJ45256
			RDH16	MGC24665	INPP5A	CD96
			SULT1B1	MEP1A	MRPL9	C10ORF4
			ADH4	SOX9	TM9SF1
			SLC38A4	SELM	LOC92482
			PLG.shed1	SLAMF8	ISCA1
			RHOB	dydo	SFRS18
			ALDH5A1	TMED3	RANBP10
			GPT2	FLJ22662	ALG5
			SELO	LOC91461	FKBP11
			LECT2	MMP12	TSN
			CIDEB	zarly	POLR2J
			COL18A1	H19	SCML2
			ADH6	STK6	GOLGA8A
			EFCBP2	CTBP2	SF3B1
			jarswerby	TUBA1	SLC7A6
			ALDH3A2	E2F8	EML4
			ECHDC3	SLC7A7	ITSN2
			LOC442096	MARCKS	HGSNAT
			CLDN14	PELI1.shed1	MOAP1
			FLJ21986	dado	CXCR4
			FLJ20366	BCAT1	MED14
			PRAP1	TTF2	LSR
			CYP1A2.1	DUSP9	KTELC1
			CPB2	CDKN3	TBC1D2B
			UGT1A10	FMNL2	ELL2
			SLC38A3	AADACL1	ISG20L1
			rawna	kehora	SLC25A13
			MGC35366	RACGAP1	KLHL24
			florborbo	DCC1	TPT1
			LOC255167	TSC	CIAPIN1
			SYTL4	RFC4	ADCK2
			DHRS1	FLJ20647	RANBP5
			TFR2	BACE2	SKI
			SLC22A1	DTL	ADARB1
			SLC16A2	PAG1	SRCAP
			SERPINA10	C4orf7	KIAA0247
			NAGS	C22orf8	TPT1
			OASL	ABCC1	C4orf30
			OGDHL		SPOCK2
					RRAGB
					ITGA5
					DNAJB9
					DHX35
					CLK1
					GRPEL1
					CD6
					TAF13
					MED6
					USP16
					IFRD1
					CYP1B1
					SFRS5
					SOX4
					BTG1
					SMAD7
					HSPH1
					JMJD6
					MALT1
					NR3C2
					LMNA
					RAB1A
					HIPK2
					APPL2
					EIF2C2
					ELK3
					KBTBD2
					FGF9
					TSN
					NENF
					IRS2
					FLJ10232
					SLC35D1
					FAM69A
					PIAS2
					ABCB1
					CCR7
					EPHA4
					SFRS6
					SFPQ
					GJB5
					SVIL
					USF2
					PASK
					SLC25A36
					POLR2C
					EFCAB6
					POLR2J4
					LOC727942
					ISCA1
					TPD52
					SON
					ZNF419
					GFPT2
					IL18R1
					P4HA2
					CCDC59
					SSR3
					SDC2
					KPNA1
					CD6
					DPM1
					CNOT2
					RANBP2
					ZNF154
					SF1
					CD28
					PRNP
					ZDHHC7
					KLHL21
					TFG
					DCHS1
					CAPN7
					PDE8A
					LTB
					SPAG1
					RNF10
					EDC4
					TPT1
					RPS3A
					MED21
					ABCG1
					SKIL
					CRY1
					NOS1
					FGFR1
					CEBPG
					TRIM23
					SKP1
					TNFRSF25
					CREBBP
					TAF9B
					WBP11
					DES
					SFRS10
					HDGFRP3
					RCAN3
					TNNC2
					POLE3
					CDR2
					UBE2J1
					USF2
					IQCE
					HTRA1
					TBC1D2B
					SIAH1
					BNIP3L
					ASXL1
					SCAND2
					FCF1
					PGK1
					CLASP2
					TMEM164
					S100B
					CDC37L1
					SUCLA2
					C6orf62
					SMCP
					EMP1
					POLR1C
					PRNP
					AP3D1
					RPLP0
					PPM1D
					TCF7L2
					CTBS
					NBL1
					RPA1
					SFRS15
					MED14
					MED9
					EIF4G2
					PBLD
					SFRS10
					UBE2D3
					FAM125B
					RPS3A
					RFC4
					HRB
					SIAH1
					LYPLA3
					PAPOLA
					SMCR7L
					SHMT1
					BAG2
					SYNCRIP
					EDG1
					CHMP2B
					C13orf27
					ZNF3
					SQSTM1
					MPV17
					UTF1
					YLPM1
					RPLP0
					ARPP-19
					RPL13
					ENOSF1
					C1orf69
					JARID1B
					ADIPOR1
					COPB1
					RPS20
					VPS13A
					PGRMC2
					GABARAPL1
					TTC9
					CSDE1
					SF3B1
					AKAP8
					PDE4DIP
					RORA
					JMJD6
					SLC25A36
					TSPYL1
					RPLP0
					EEF1A1
					TOE1
					RPS14
					KPNA6
					ZNF131
					PGK1
					GLTSCR2
					MKRN1
					B3GNT3
					JAM3
					BRAF
					LDHA
					ASB6
					TMED7
					CABC1
					GNL3
					PDE4DIP
					CHD7
					SFRS7
					PDCD4
					ZCCHC8
					ZNF10
					NAP1L1
					TMEM1
					TMEM70
					MAPK8
					EIF1
					PKIA
					ZCCHC14
					TNPO1
					ATHL1
					HDGFRP3
					TMEM47
					TPT1
					RPS24
					VIPR2
					PAK1IP1
					BUB1
					MAP3K7IP2
					PPP2R3C
					NRF1
					CREBBP
					ETS2
					ESPL1
					IVD
					HNRNPA1
					ZNF419
					ALDH1A2
					SOS2
					DDX3X
					JARID1B
					MERTK
					LOC286440
					LRRN3
					TMEM1
					NAP1L1
					CYB56
					SLC11A2
					PPARD
					C13orf18
					OCLM
					EIF5
					DDX3X
					KCNJ12
					COPS2
					APBA2
					GGA1
					GMEB2
					PTBP2
					MTHFD2L
					TPP2
					PPP1R13B
					MID1
					RANBP6
					PSMD12
					HIPK2
					MXD4
					CHPT1
					PGAP1
					MPP2
					SFTPB
					CACYBP
					HMG4L
					MPP5
					THUMPD2
					RHD
					TNFRSF21
					EIF3EIP
					ING2
					C19orf36
					RHOQ
					MED27
					KIR2DS1
					PRUNE2
					ZHX3
					NR4A2
					RAB26
					PGK1
					TWF1
					XYLT1
					NR4A3
					MID2
					SPRY1
					ADNP2
					FXYD5
					C20orf67
					PKN2
					FLJ22167
					SFRS18
					FABP1
					AMELX
					SPSB3
					DXS542
					GUCY1B3
					JUN
					PAIP1
					ZNF223
					CTGLF2
					NENF
					THADA
					SFPQ
					TMEM97
					MAFF
					CD6
					DNPEP
					CLK4
					GPR107
					AKT3
					MAD2L1
					LOC130074
					SCGB1D2
					HNRPUL1
					ABHD5
